# Supplementary material
Source: MDPI journal article supplement (https://www.mdpi.com/2297-8747/27/2/28)
Supplement: s1 [file s1]

## Supplementary material

**Table S1. Non-individualized simulation parameters** - Cardiovascular simulation model parameters not individually adapted to every animal used for the simulation.

| Symbol                              | Description                                            | Value                                              |
|-------------------------------------|--------------------------------------------------------|----------------------------------------------------|
| <b>Systemic circulatory system</b>  |                                                        |                                                    |
| $R_s$                               | Systemic arterial resistance                           | See Table 1 $\text{mmHg} \cdot \text{s}/\text{ml}$ |
| $Z_c$                               | Specific aortal resistance                             | See Table 1 $\text{mmHg} \cdot \text{s}/\text{ml}$ |
| $C_s$                               | Systemic arterial compliance                           | See Table 1 $\text{mmHg}/\text{ml}$                |
| $V0_{sC}$                           | Unstressed volume of the systemic arterial compliance  | 0 ml                                               |
| $Rv_s$                              | Systemic venous resistance                             | 0.084 $\text{mmHg} \cdot \text{s}/\text{ml}$       |
| $Cv_s$                              | Systemic venous compliance                             | 85 $\text{mmHg}/\text{ml}$                         |
| $V0_{vC}$                           | Unstressed volume of the systemic venous compliance    | See Table 1 ml                                     |
| <b>Pulmonary circulatory system</b> |                                                        |                                                    |
| $R_p$                               | Pulmonary arterial resistance                          | 0.08 $\text{mmHg} \cdot \text{s}/\text{ml}$        |
| $Z_p$                               | Specific resistance of the pulmonary artery            | 0.004 $\text{mmHg} \cdot \text{s}/\text{ml}$       |
| $C_p$                               | Pulmonary arterial compliance                          | 0.1 $\text{mmHg}/\text{ml}$                        |
| $V0_{pC}$                           | Unstressed volume of the pulmonary arterial compliance | 0 ml                                               |
| $Rv_p$                              | Pulmonary venous resistance                            | 0.08 $\text{mmHg} \cdot \text{s}/\text{ml}$        |
| $Cv_p$                              | Pulmonary venous compliance                            | 10 $\text{mmHg}/\text{ml}$                         |

|             |                                                      |      |
|-------------|------------------------------------------------------|------|
| $V0_{v_pC}$ | Unstressed volume of the pulmonary venous compliance | 0 ml |
|-------------|------------------------------------------------------|------|

### **Valves**

|      |                                   |                   |
|------|-----------------------------------|-------------------|
| $TV$ | Resistance of the tricuspid valve | 0.01 mmHg · s/ml  |
| $PV$ | Resistance of the pulmonary valve | 0.001 mmHg · s/ml |
| $MV$ | Resistance of the mitral valve    | 0.01 mmHg · s/ml  |
| $AV$ | Resistance of the aortic valve    | 0.001 mmHg · s/ml |

### **Time varying elastance right atrium**

|           |                                       |             |
|-----------|---------------------------------------|-------------|
| $E_{ES}$  | Slope of the linear ESPVR             | 0.1 mmHg/ml |
| $V0_{ES}$ | Unstressed volume of the ESPVR        | 20 ml       |
| $E_{ED}$  | Slope of the EDPVR                    | 0.1 mmHg/ml |
| $V0_{ED}$ | Unstressed volume of the EDPVR        | -25 mmHg    |
| $k_D$     | Time shift of normalized time $t_n$   | 0 s         |
| $k_O$     | Offset shift of normalized time $t_n$ | -0.2 s      |

### **Time varying elastance left atrium**

|           |                                     |             |
|-----------|-------------------------------------|-------------|
| $E_{ES}$  | Slope of the linear ESPVR           | 0.1 mmHg/ml |
| $V0_{ES}$ | Unstressed volume of the ESPVR      | 20 ml       |
| $E_{ED}$  | Slope of the EDPVR                  | 0.1 mmHg/ml |
| $V0_{ED}$ | Unstressed volume of the EDPVR      | 20 ml       |
| $k_D$     | Time shift of normalized time $t_n$ | 0 s         |

|       |                                          |        |
|-------|------------------------------------------|--------|
| $k_O$ | Offset shift of normalized time<br>$t_n$ | -0.2 s |
|-------|------------------------------------------|--------|

#### ***Time varying elastance right ventricle***

|           |                                          |           |
|-----------|------------------------------------------|-----------|
| $V0_{ED}$ | Slope of the linear ESPVR                | 1 mmHg/ml |
| $V0_{ES}$ | Unstressed volume of the ESPVR           | 10 ml     |
| $P0$      | Coefficient of the exponential EDPVR     | 1 mmHg    |
| $\lambda$ | Coefficient of the exponential EDPVR     | 0.025     |
| $V0_{ED}$ | Unstressed volume of the EDPVR           | 45 ml     |
| $k_D$     | Time shift of normalized time<br>$t_n$   | 0.2 s     |
| $k_O$     | Offset shift of normalized time<br>$t_n$ | -0.2 s    |

#### ***Time varying elastance left ventricle***

|           |                                          |             |         |
|-----------|------------------------------------------|-------------|---------|
| $E_{ES}$  | Slope of the linear ESPVR                | See Table 1 | mmHg/ml |
| $V0_{ES}$ | Unstressed volume of the ESPVR           | See Table 1 | ml      |
| $P0_{ED}$ | Coefficient of the exponential EDPVR     | See Table 1 | mmHg    |
| $\lambda$ | Coefficient of the exponential EDPVR     | See Table 1 |         |
| $V0_{ED}$ | Unstressed volume of the EDPVR           | See Table 1 | ml      |
| $k_D$     | Time shift of normalized time<br>$t_n$   | 0.2         | s       |
| $k_O$     | Offset shift of normalized time<br>$t_n$ | -0.2        | s       |

#### ***Activation function ventricles and atria***

|     |       |          |          |
|-----|-------|----------|----------|
| $i$ | $A_i$ | $B_i(s)$ | $C_i(s)$ |
|-----|-------|----------|----------|

---

|          |                       |                       |                       |
|----------|-----------------------|-----------------------|-----------------------|
| <b>1</b> | $-1.637 \cdot 10^1$   | $2.280 \cdot 10^{-1}$ | $9.525 \cdot 10^{-2}$ |
| <b>2</b> | $2.561 \cdot 10^{-1}$ | $2.519 \cdot 10^{-1}$ | $4.046 \cdot 10^{-2}$ |
| <b>3</b> | $6.580 \cdot 10^{-1}$ | $2.100 \cdot 10^{-1}$ | $5.217 \cdot 10^{-2}$ |
| <b>4</b> | $1.651 \cdot 10^1$    | $2.294 \cdot 10^{-1}$ | $1.012 \cdot 10^{-1}$ |
| <b>5</b> | $1.662 \cdot 10^{-1}$ | $5.914 \cdot 10^{-2}$ | $4.036 \cdot 10^{-2}$ |

### ***Initial Parameters***

|            |                                              |           |
|------------|----------------------------------------------|-----------|
| $V_{lv,0}$ | Initial volume of the left ventricle         | 130.9 ml  |
| $V_{la,0}$ | Initial volume of the left atrium            | 126.5 ml  |
| $V_{rv,0}$ | Initial volume of the right ventricle        | 132.8 ml  |
| $V_{ra,0}$ | Initial volume of the right atrium           | 35.27 ml  |
| $V_{C_s}$  | Initial systemic arterial compliance volume  | 94.8 ml   |
| $V_{Cv_s}$ | Initial systematic venous compliance volume  | 1924.9 ml |
| $V_{C_p}$  | Initial pulmonary arterial compliance volume | 1.9 ml    |
| $V_{Cv_p}$ | Initial pulmonary venous compliance volume   | 192.9 ml  |
